# Supplementary material for: Unusual phosphine oxidation: new triazolopyridyl-quinolyl phosphine oxide fluorescent dyes
Source: Royal Society of Chemistry journal article supplement (doi:10.1039/c5ra04386g), 2015-01-01
Supplement: c5ra04386g1.pdf [file c5ra04386g1.pdf]

## Electronic Supplementary Material

### Unusual Phosphine Oxidation: New Triazolopyridine-Quinoline Phosphine Oxide Fluorescents Dyes

**R. Ballesteros-Garrido<sup>a,b</sup>, B. Abarca<sup>b</sup>, R. Ballesteros<sup>b</sup>, F. Colobert<sup>a</sup>, F.  
Leroux<sup>a</sup>, E. García-España<sup>c</sup>**

a) Laboratoire de Stéréochimie, CNRS, Université de Strasbourg (ECPM), 25 rue Becquerel, 67087  
Strasbourg, France

b) Departamento de Química Orgánica, Facultad de Farmacia, Universidad de Valencia, Avd. Vte.  
Andrés Estellés s/n, 46100 Burjassot, Valencia, Spain

c) ICMol Instituto de ciencias moleculares, Universidad de Valencia, 46100 Burjassot Spain.

## General procedures

Starting materials, if commercially available, were purchased and used as such, provided that suitable checks (melting ranges, refractive indices and gas chromatography) had confirmed the claimed purity. When known compounds had to be prepared by literature procedures, pertinent references are given. Air- and moisture-sensitive materials were stored in Schlenk tubes. They were protected by and handled under argon, in appropriate glassware. Tetrahydrofuran was dried by distillation from sodium after the characteristic blue colour of sodium diphenyl ketyl (benzophenone-sodium “radical-anion”) had been seen to persist. Ethereal or other organic extracts were dried by washing with brine and then by storage over sodium sulfate. Melting points or ranges (m.p.) given were determined on a Kofler heated stage and found to be reproducible after recrystallization, unless stated otherwise (“decomp.”). Column chromatography was carried out on a column packed with silica gel (60N spherical neutral size 63–210  $\mu\text{m}$ ).  $^1\text{H}$  and ( $^1\text{H}$  decoupled)  $^{13}\text{C}$  nuclear magnetic resonance (NMR) spectra were recorded at 400 or 300 and 101 or 75 MHz, respectively. Chemical shifts are reported in  $\delta$  units, parts per million (ppm), and were measured relative to the signals for residual chloroform ( $\delta = 7.27$  ppm). Coupling constants ( $J$ ) are given in Hz. Coupling patterns are abbreviated as, for example, s (singlet), d (doublet), t (triplet), td (triplet of doublets), m (multiplet), app. s (apparent singlet) and br. (broad). COSY experiments were performed for all compounds. HRMS Electron Impact (EI) or ElectroSpray (ES) determinations were made using a VG Autospec Trio 1000 (Fisons). The solvents used were of spectroscopic or equivalent grade. Water was twice distilled and passed through a Millipore apparatus. UV-Vis absorption spectra were recorded on an Agilent 8453 spectroscopy system. The emission spectra were recorded with a PTI MO-5020 spectrofluorimeter in the 300–600 nm range and JASCO FP-6200 spectrofluorimeter at room temperature.. Quantum yield was determined with a Hamamatsu-PHA equipment. Ligand solutions were prepared  $10^{-5}$  M in ethanol-water 98/2 w/w. Metal solutions were prepared with nitrate salts (Mn, Pb, Ag), chloride (Co, Ni, Cd), perchlorate (Zn, Cu) sulfate (Fe(III) Fe(II)NH<sub>4</sub>SO<sub>4</sub>) in 0,1 to 0,005 M.

**2-([1,2,3]triazolo[1,5-*a*]pyridin-3-yl)-8-(diphenylphosphoryl)quinoline (8):** yellow powder ( 0.8 g, 89%). Mp 241°C decomp. <sup>1</sup>H NMR (300 MHz, CDCl<sub>3</sub>): δ = 9.06 (d, *J* = 8.9 Hz, 1H), 8.68 (d, *J* = 6.9 Hz, 1H), 8.57 (d, *J* = 8.7 Hz, 1H), 8.29 (dd, *J* = 8.7, 1.1 Hz, 1H), 8.03 (d, *J* = 7.9 Hz, 1H), 7.8-7.7 (m, 4H), 7.6-7.3 (m, 9H), 7.02 (dt, *J* = 6.8, 6.8, 0.7 Hz, 1H) <sup>13</sup>C NMR (75.5 MHz, CDCl<sub>3</sub>): δ = 152.1 (C), 148.8 (d, *J* = 4.4 Hz, C), 137.3 (d, *J* = 10.5 Hz, CH), 137.0 (d, *J* = 21.0 Hz, C), 136.9 (CH), 133.9 (C) 133.0 (d, *J* = 2.7 Hz, CH), 132.7 (d, *J* = 20.6 Hz, 2C), 132.0 (d, *J* = 9.9 Hz, 4CH), 131.5 (d, *J* = 2.9 Hz, 2CH), 130.8 (d, *J* = 1.4 Hz, C) 128.4 (d, *J* = 12.3 Hz, 4CH), 127.7 (d, *J* = 7.1 Hz, C), 127.1 (CH), 125.0 (d, *J* = 13.7 Hz, CH), 124.7 (CH), 122.6 (CH), 119.9 (CH), 116.3 (CH). <sup>31</sup>P NMR (161 MHz, CDCl<sub>3</sub>): δ = 31.0 (PO). MS(EI): *m/z*(%) = 446(10), 418(52), 417(100), 340(19). HRMS ESI-[TOF] for C<sub>27</sub>H<sub>19</sub>N<sub>4</sub>OP: calcd. 446.1296; found 446.1300.

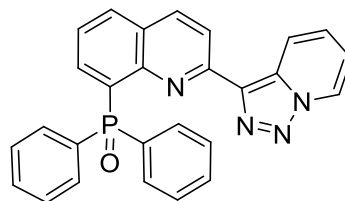

**8 (89%)**

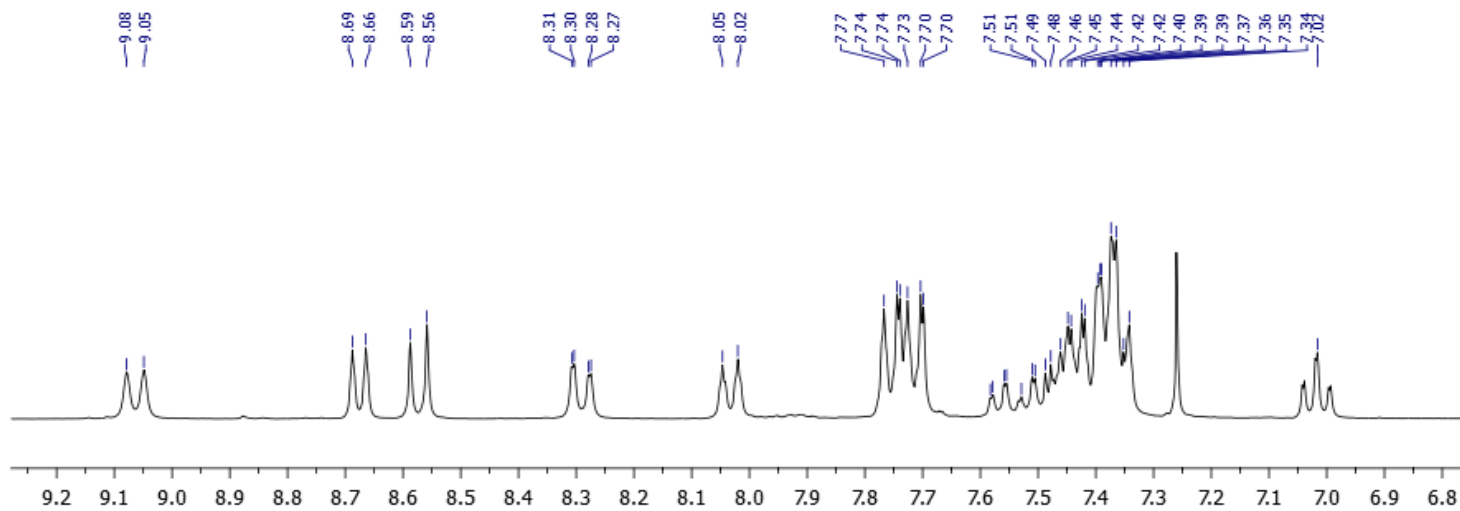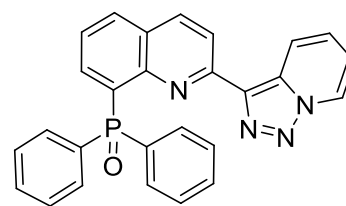

**8 (89%)**

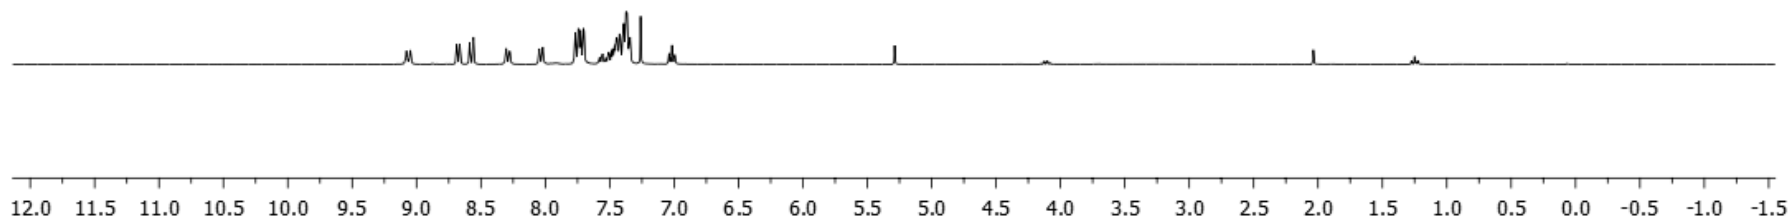

**Figure S1:  $^1\text{H}$  NMR (300 MHz,  $\text{CDCl}_3$ ) of **8**:**

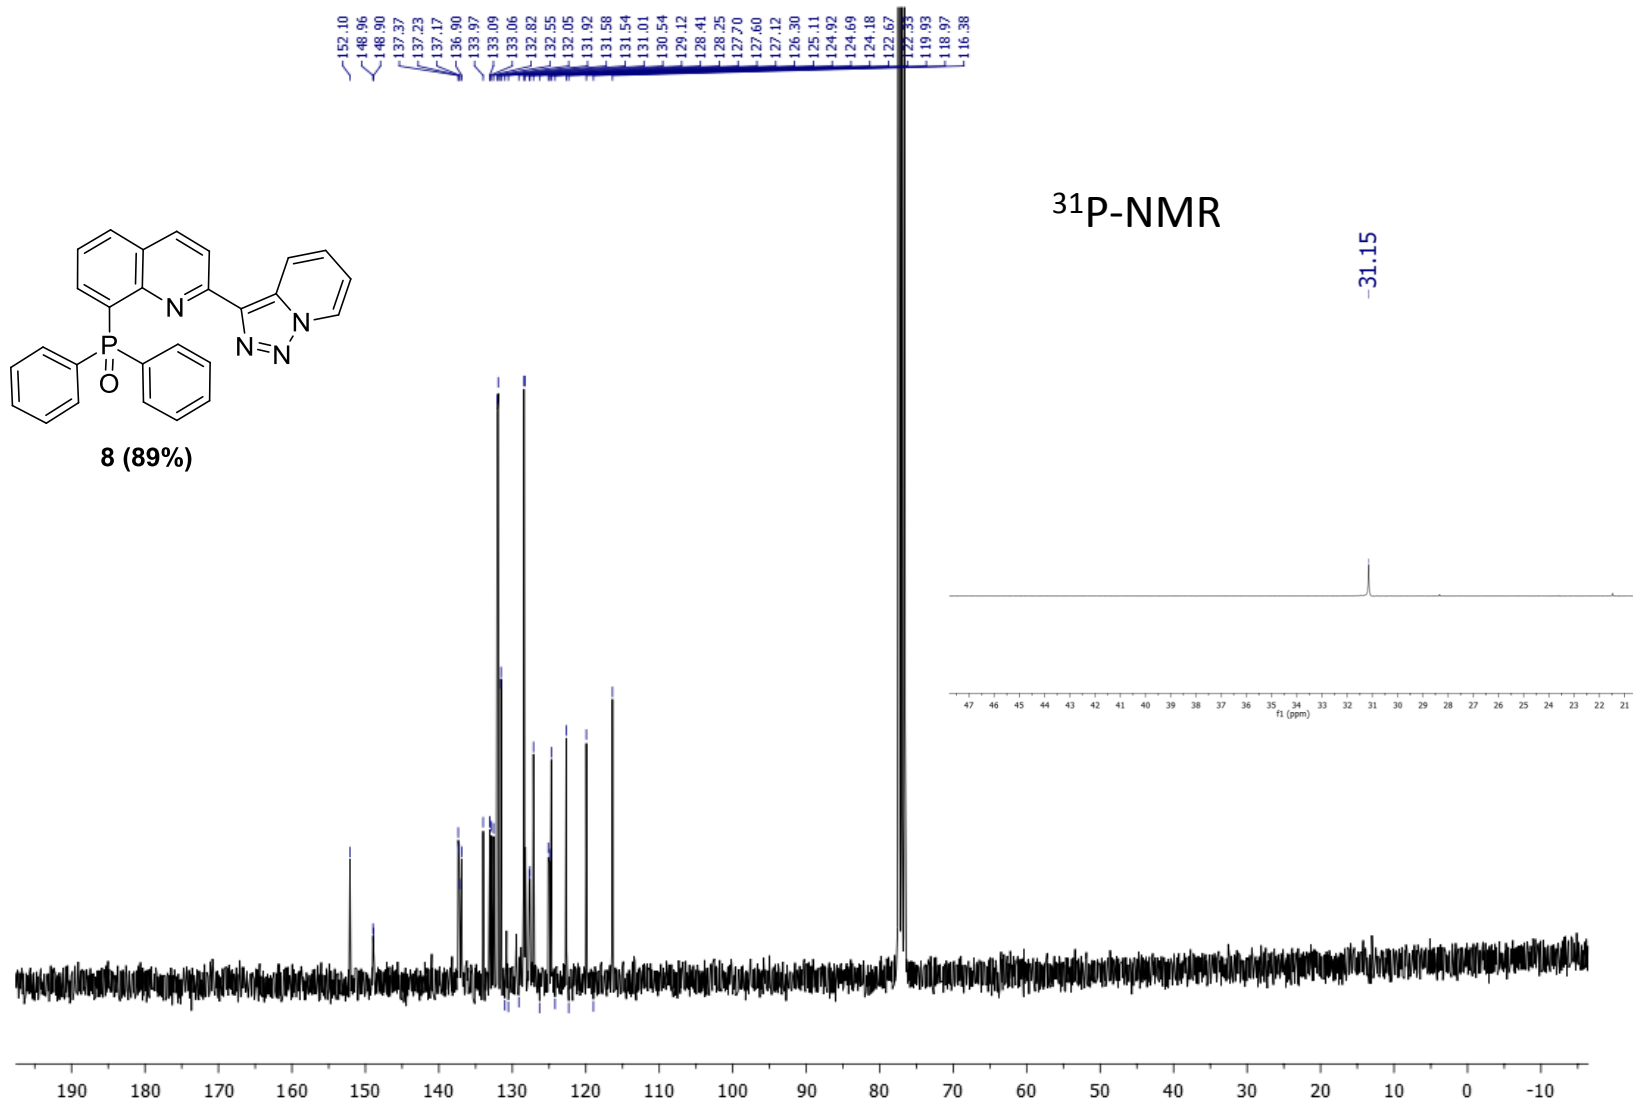

**Figure S2:** <sup>13</sup>C NMR (75.5 MHz, CDCl<sub>3</sub>) and <sup>31</sup>P NMR (161 MHz, CDCl<sub>3</sub>) of **8**:

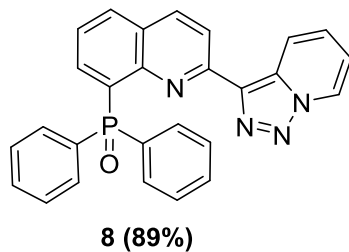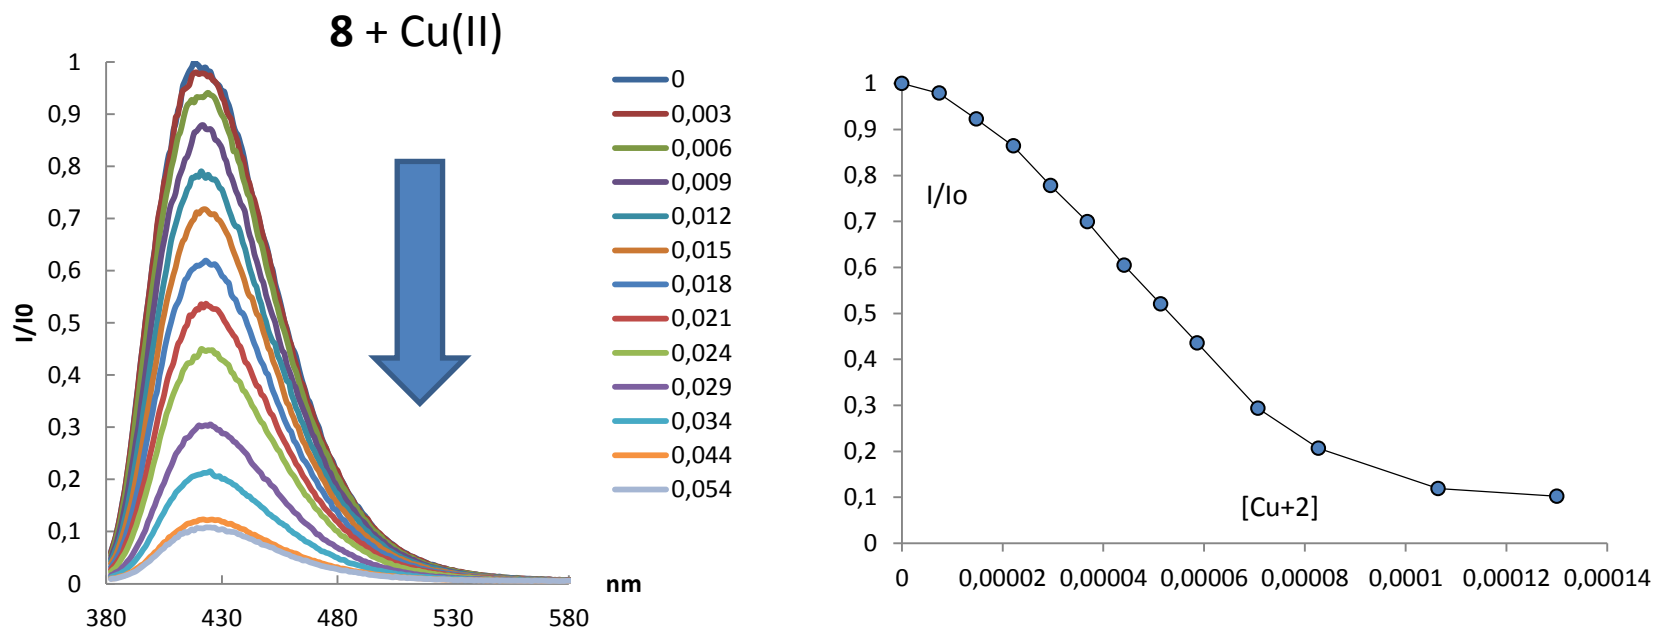

**Figure S3:** Fluorescence Quenching of **8** upon the addition of copper perchlorate salt

**2-([1,2,3]triazolo[1,5-*a*]pyridin-3-yl)-8-(bis(4-(trifluoromethyl)phenyl)phosphoryl)quinoline (9):** yellow powder ( 0.5 g, 81%). mp 247 – 250 °C decomp. <sup>1</sup>H NMR (300 MHz, CDCl<sub>3</sub>): δ = 8.75 (d, *J* = 8.9 Hz, 1H), 8.64 (d, *J* = 7.0 Hz, 1H), 8.53 (d, *J* = 8.7 Hz, 1H), 8.25 (dd, *J* = 8.7, 1.5 Hz, 1H), 8.03 (d, *J* = 7.9 Hz, 1H), 7.83 (d, *J* = 11.7 Hz, 2H), 7.80 (d, *J* = 11.8 Hz, 2H), 7.62-7.54 (m, 4H), 7.55-7.41 (m, 2H), 7.27 (dd, *J* = 8.9, 6.8 Hz, 1H), 6.97 (dt, *J* = 6.8, 6.8, 1.1 Hz, 1H). <sup>13</sup>C NMR (75.5 MHz, CDCl<sub>3</sub>): δ = 152.6 (C), 148.7 (d, *J* = 4.46 Hz, C), 137.9 (C), 137.3 (d, *J* = 10.5 Hz, CH), 137.0 (d, *J* = 1.0 Hz, CH), 136.9 (d, *J* = 30.0 Hz, C), 136.5 (C), 133.93 (CH), 133.9 (CH), 133.7 (qd, *J* = 30.4, 30.4 30.4, 1.1 Hz, 2×C), 132.7 (C), 132.4 (d, *J* = 10.2 Hz, 4×CH), 127.7 (d, *J* = 7.4 Hz, 2×C), 127.6 (C), 127.3 (CH), 127.4 (q, *J* = 280.1 Hz, 2×C), 125.4 (dq, *J* = 11.1, 3.7, 3.7, 3.7 Hz, 4×CH), 125.1 (CH), 121.7 (CH), 120.5 (CH), 116.4 (CH). <sup>31</sup>P NMR (161 MHz, CDCl<sub>3</sub>): δ = 28.0 (PO). MS (EI): *m/z*(%) = 582(12), 555(43), 554(100), 553(80), 533,(47), 409(33), 355(50), 338(38). HRMS ESI-[TOF] for C<sub>29</sub>H<sub>17</sub>F<sub>6</sub>N<sub>4</sub>OP: calcd. 582.1044; found 582.1048.

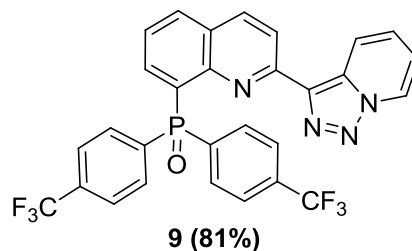

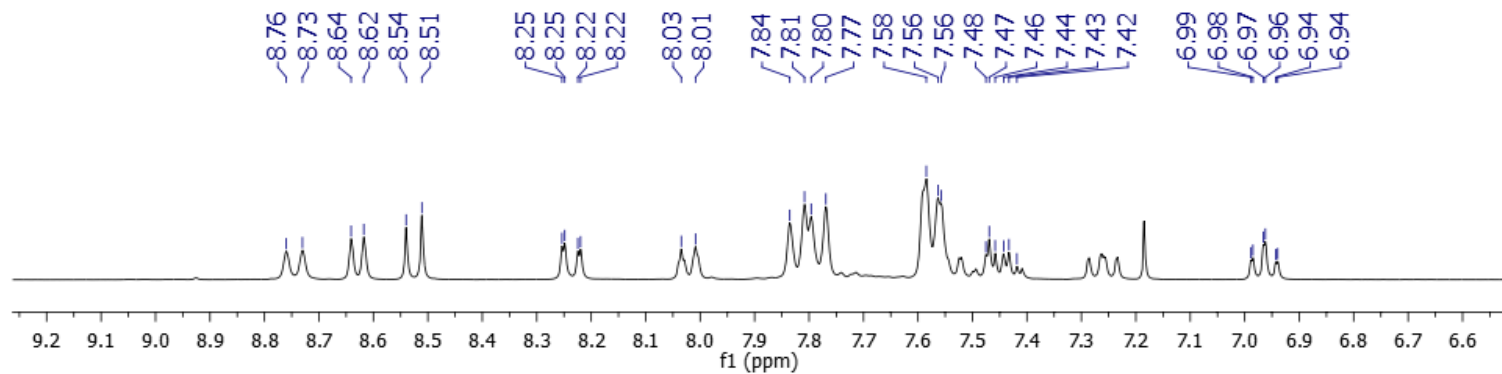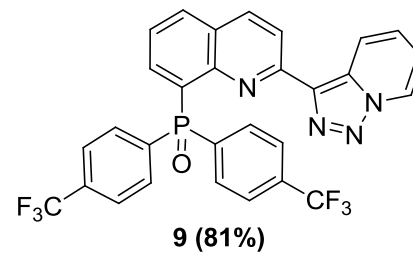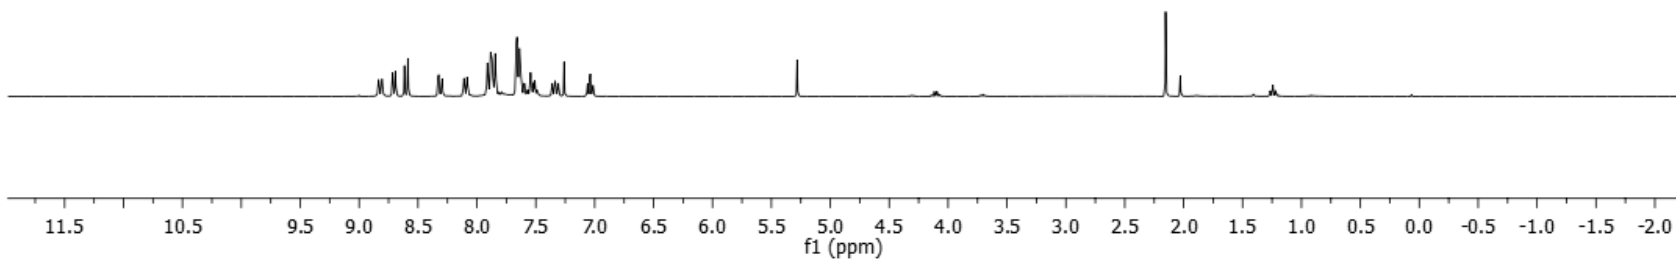

**Figure S4:** <sup>1</sup>H NMR (300 MHz, CDCl<sub>3</sub>) of **9**:



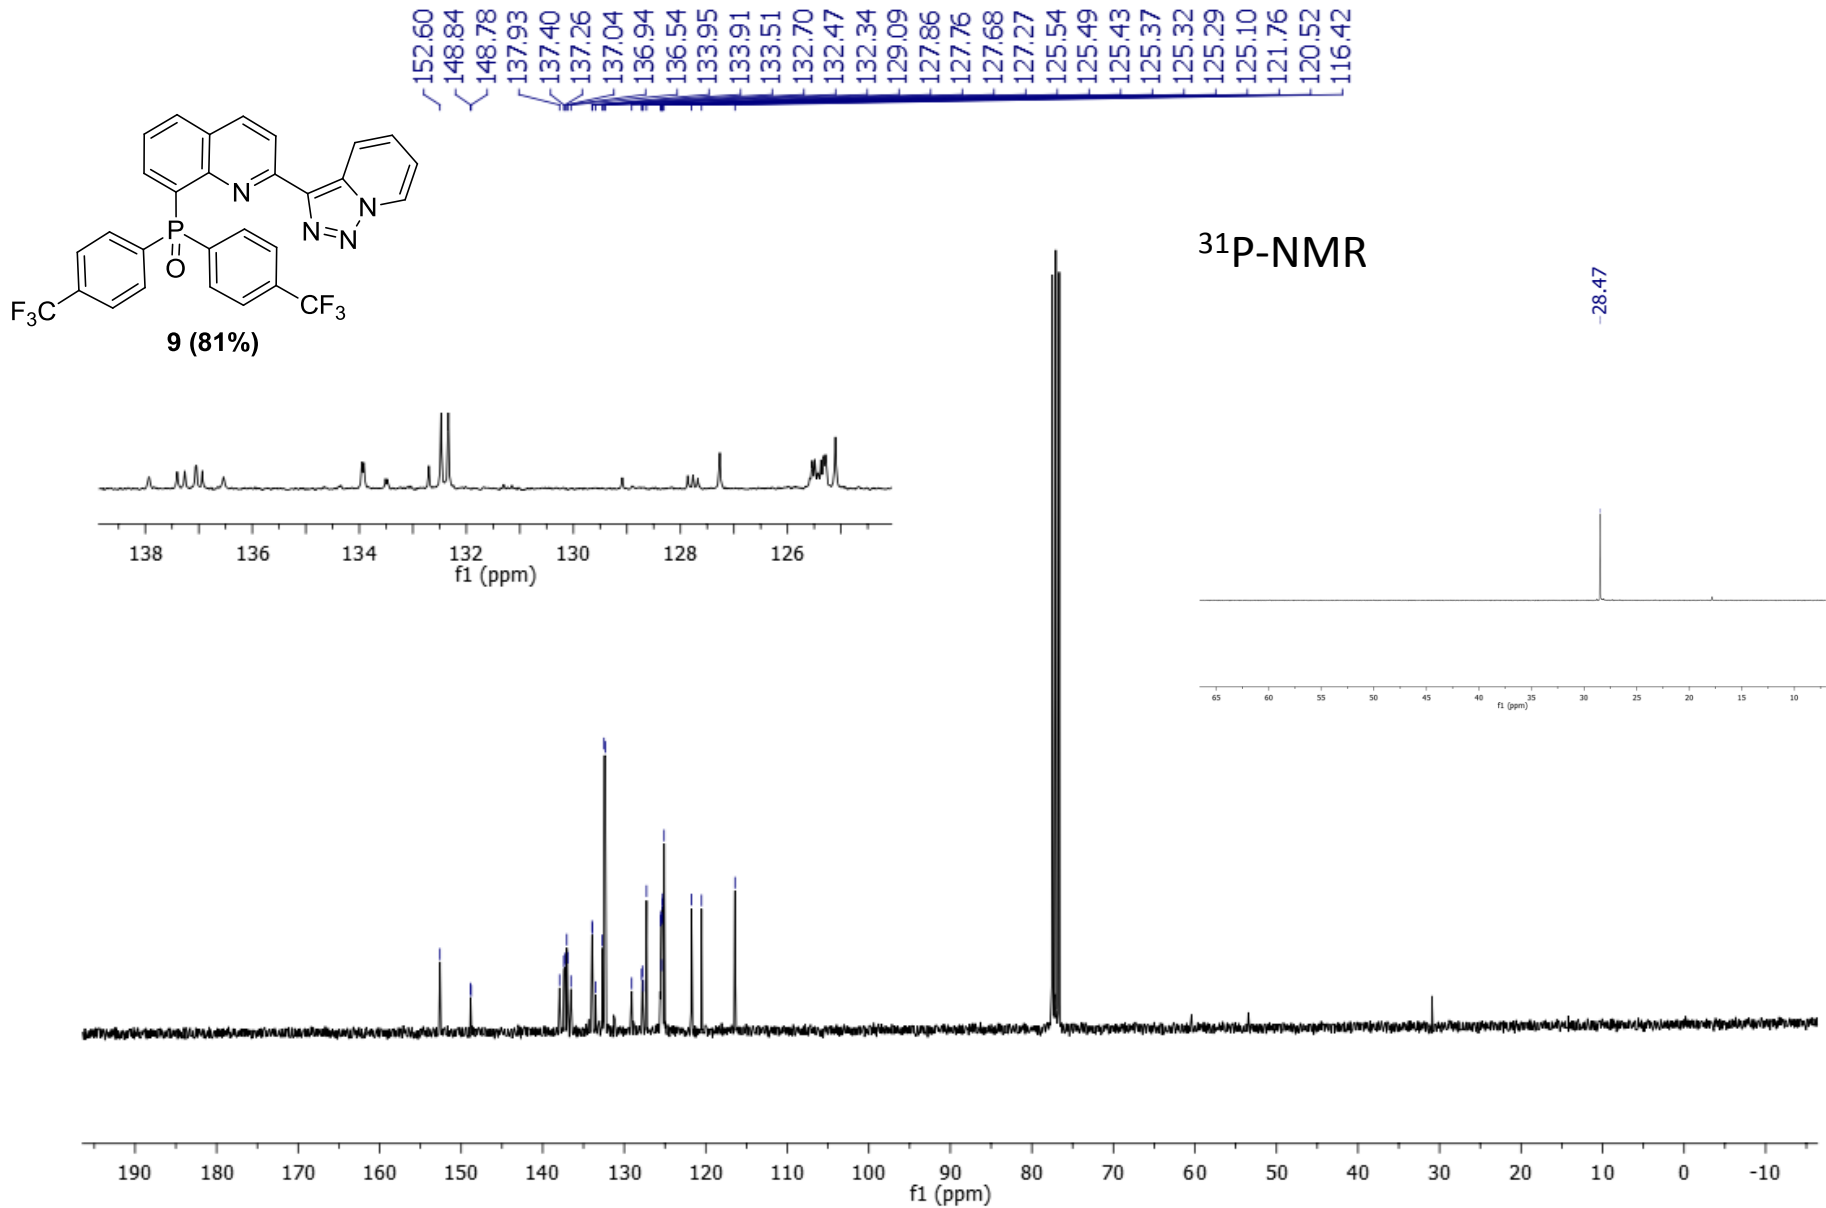

**Figure S5:** <sup>13</sup>C NMR (75.5 MHz, CDCl<sub>3</sub>) and <sup>31</sup>P NMR (161 MHz, CDCl<sub>3</sub>) of **9**:

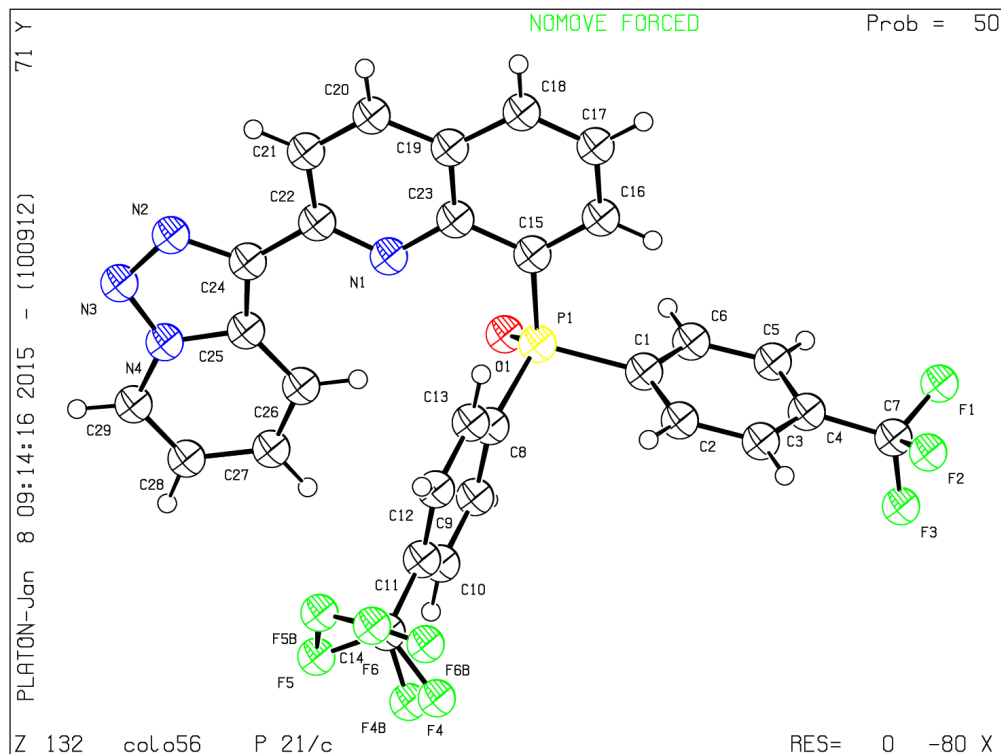

Monoclinic, P21/c  
 $a = 7.6938 (2) \text{ \AA}$   
 $b = 12.9560 (2) \text{ \AA}$   
 $c = 26.6662 (7) \text{ \AA}$   
 $\beta = 99.140 (1)^\circ$   
 $V = 2624.36 \text{ \AA}^3$

**Figure S6:** X-ray analysis of **9**, Small rotation caused disorder is observed for one of the  $\text{CF}_3$  groups due to group rotation, in the paper this has been removed for clarity.

**Table S1.** Fractional atomic coordinates for **9**

|            | <b>x</b>    | <b>y</b>    | <b>z</b>      |  |            | <b>x</b>     | <b>y</b>      | <b>z</b>      |
|------------|-------------|-------------|---------------|--|------------|--------------|---------------|---------------|
| <b>C1</b>  | -0.0058 (4) | -0.2662 (3) | -0.42751 (12) |  | <b>H20</b> | 0.4656       | -0.2390       | -0.1640       |
| <b>C2</b>  | 0.1009 (5)  | -0.2444 (3) | -0.46330 (15) |  | <b>C21</b> | 0.3891 (5)   | -0.3835 (3)   | -0.18381 (14) |
| <b>H2</b>  | 0.2177      | -0.2705     | -0.4590       |  | <b>H21</b> | 0.4355       | -0.4145       | -0.1522       |
| <b>C3</b>  | 0.0388 (6)  | -0.1847 (3) | -0.50539 (15) |  | <b>C22</b> | 0.3016 (4)   | -0.4445 (3)   | -0.22445 (13) |
| <b>H3</b>  | 0.1119      | -0.1714     | -0.5302       |  | <b>C23</b> | 0.2509 (4)   | -0.3014 (2)   | -0.27638 (12) |
| <b>C4</b>  | -0.1286 (6) | -0.1448 (3) | -0.51124 (15) |  | <b>C24</b> | 0.2798 (4)   | -0.5554 (3)   | -0.21779 (13) |
| <b>C5</b>  | -0.2357 (5) | -0.1637 (3) | -0.47542 (16) |  | <b>C25</b> | 0.2002 (4)   | -0.6274 (3)   | -0.25239 (13) |
| <b>H5</b>  | -0.3504     | -0.1346     | -0.4794       |  | <b>C26</b> | 0.1046 (5)   | -0.6300 (3)   | -0.30245 (14) |
| <b>C6</b>  | -0.1765 (5) | -0.2251 (3) | -0.43362 (15) |  | <b>H26</b> | 0.0783       | -0.5680       | -0.3212       |
| <b>H6</b>  | -0.2510     | -0.2393     | -0.4093       |  | <b>C27</b> | 0.0516 (6)   | -0.7226 (3)   | -0.32297 (16) |
| <b>C7</b>  | -0.1978 (7) | -0.0842 (3) | -0.55808 (17) |  | <b>H27</b> | -0.0101      | -0.7255       | -0.3568       |
| <b>C8</b>  | 0.2306 (4)  | -0.4299 (2) | -0.39192 (12) |  | <b>C28</b> | 0.0866 (5)   | -0.8157 (3)   | -0.29495 (16) |
| <b>C9</b>  | 0.1696 (4)  | -0.5145 (3) | -0.42211 (14) |  | <b>H28</b> | 0.0490       | -0.8798       | -0.3103       |
| <b>H9</b>  | 0.0467      | -0.5267     | -0.4305       |  | <b>C29</b> | 0.1731 (5)   | -0.8137 (3)   | -0.24658 (16) |
| <b>C10</b> | 0.2869 (5)  | -0.5805 (3) | -0.43988 (15) |  | <b>H29</b> | 0.1938       | -0.8751       | -0.2271       |
| <b>H10</b> | 0.2451      | -0.6379     | -0.4605       |  | <b>F1</b>  | -0.3153 (7)  | -0.0148 (3)   | -0.55100 (15) |
| <b>C11</b> | 0.4663 (4)  | -0.5623 (3) | -0.42739 (13) |  | <b>F2</b>  | -0.0708 (6)  | -0.0327 (3)   | -0.57639 (15) |
| <b>C12</b> | 0.5289 (4)  | -0.4797 (3) | -0.39722 (14) |  | <b>F3</b>  | -0.2661 (5)  | -0.1435 (2)   | -0.59596 (11) |
| <b>H12</b> | 0.6521      | -0.4686     | -0.3885       |  | <b>F4</b>  | 0.5519 (11)  | -0.6385 (5)   | -0.5000 (3)   |
| <b>C13</b> | 0.4105 (4)  | -0.4127 (3) | -0.37959 (13) |  | <b>F5</b>  | 0.5756 (8)   | -0.7325 (5)   | -0.4334 (2)   |
| <b>H13</b> | 0.4528      | -0.3551     | -0.3591       |  | <b>F6</b>  | 0.7557 (9)   | -0.6116 (5)   | -0.4362 (3)   |
| <b>C14</b> | 0.5910 (5)  | -0.6334 (3) | -0.44764 (16) |  | <b>N1</b>  | 0.2380 (3)   | -0.4057 (2)   | -0.26957 (10) |
| <b>C15</b> | 0.1753 (4)  | -0.2599 (2) | -0.32426 (12) |  | <b>N2</b>  | 0.3493 (4)   | -0.6048 (3)   | -0.17440 (12) |
| <b>C16</b> | 0.1823 (5)  | -0.1547 (3) | -0.33195 (14) |  | <b>N3</b>  | 0.3208 (5)   | -0.7044 (3)   | -0.17901 (13) |
| <b>H16</b> | 0.1310      | -0.1266     | -0.3638       |  | <b>N4</b>  | 0.2297 (4)   | -0.7196 (2)   | -0.22684 (12) |
| <b>C17</b> | 0.2642 (5)  | -0.0882 (3) | -0.29345 (15) |  | <b>O1</b>  | -0.0854 (3)  | -0.40489 (18) | -0.35758 (9)  |
| <b>H17</b> | 0.2679      | -0.0160     | -0.2995       |  | <b>P1</b>  | 0.06508 (10) | -0.34648 (6)  | -0.37219 (3)  |
| <b>C18</b> | 0.3384 (5)  | -0.1273 (3) | -0.24731 (15) |  | <b>F4B</b> | 0.5330 (11)  | -0.6760 (5)   | -0.4914 (3)   |
| <b>H18</b> | 0.3936      | -0.0821     | -0.2216       |  | <b>F5B</b> | 0.7153 (9)   | -0.6669 (5)   | -0.4106 (3)   |
| <b>C19</b> | 0.3336 (4)  | -0.2346 (3) | -0.23756 (13) |  | <b>F6B</b> | 0.7227 (9)   | -0.5742 (5)   | -0.4662 (3)   |
| <b>C20</b> | 0.4056 (5)  | -0.2804 (3) | -0.19071 (14) |  |            |              |               |               |

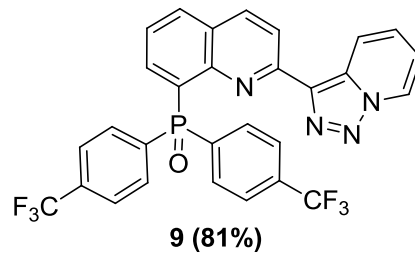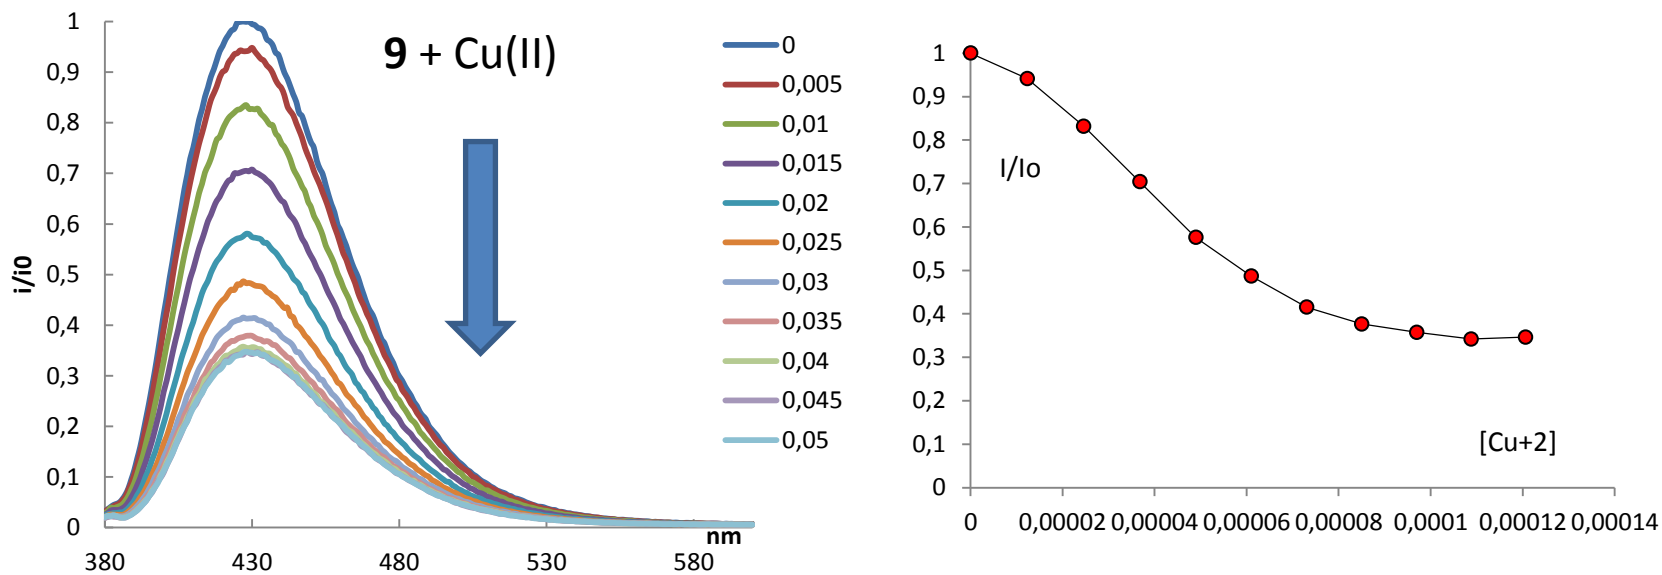

**Figure S7:** Fluorescence Quenching of **9** upon the addition of copper perchlorate salt

**2-([1,2,3]triazolo[1,5-*a*]pyridin-3-yl)-8-(bis(4-methoxy phenyl)phosphoryl)quinoline (10):** Pale colourless needles (0.4 g, 72%). mp 260 °C decomp. <sup>1</sup>H NMR (300 MHz, CDCl<sub>3</sub>): δ = 9.11 (d, *J* = 8.9 Hz, 1H), 8.67 (d, *J* = 7.0 Hz, 1H), 8.54 (d, *J* = 8.7 Hz, 1H), 8.25 (dd, *J* = 8.7, 1.2 Hz, 1H), 7.99 (d, *J* = 8.0 Hz, 1H), 7.69-7.58 (m, 4H), 7.59-7.49 (m, 1H), 7.43 (dt, *J* = 7.7, 7.4, 2.3 Hz, 1H), 7.35 (dd, *J* = 8.3, 7.2 Hz, 1H), 7.00 (t, *J* = 6.8, 6.8 Hz, 1H), 6.86 (dd, *J* = 8.8, 2.0 Hz, 4H), 3.75 (s, 6H). <sup>13</sup>C NMR (75.5 MHz, CDCl<sub>3</sub>): δ = 162.0 (d, *J* = 2.8 Hz, 2×C), 152.1 (C), 150.0 (d, *J* = 4.4 Hz, C), 137.4 (C), 137.2 (d, *J* = 10.5 Hz, CH), 136.7 (CH), 133.8 (d, *J* = 11.3 Hz, 4×CH), 132.8 (d, *J* = 2.6 Hz, CH), 131.8 (C), 130.4 (C), 127.6 (d, *J* = 7.0 Hz, 2×C), 127.1 (CH), 125.7 (C), 125.0 (d, *J* = 13.7 Hz, CH), 124.7 (CH), 124.2 (C), 122.8 (CH), 119.7 (CH), 116.4 (CH), 113.9 (d, *J* = 13.4 Hz, 4×C), 55.2 (s, 2C) <sup>31</sup>P NMR (161 MHz, CDCl<sub>3</sub>): δ = 30.6 (PO). MS (EI): *m/z*(%) = 506(12), 478(37), 477(100), 462(22). HRMS ESI-[TOF] for C<sub>29</sub>H<sub>23</sub>N<sub>4</sub>O<sub>3</sub>P: calcd. 506.1508; found 506.1504.

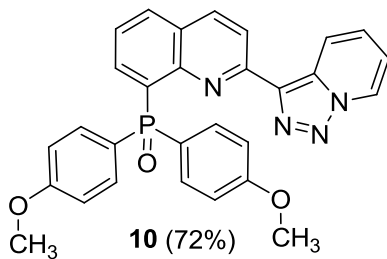

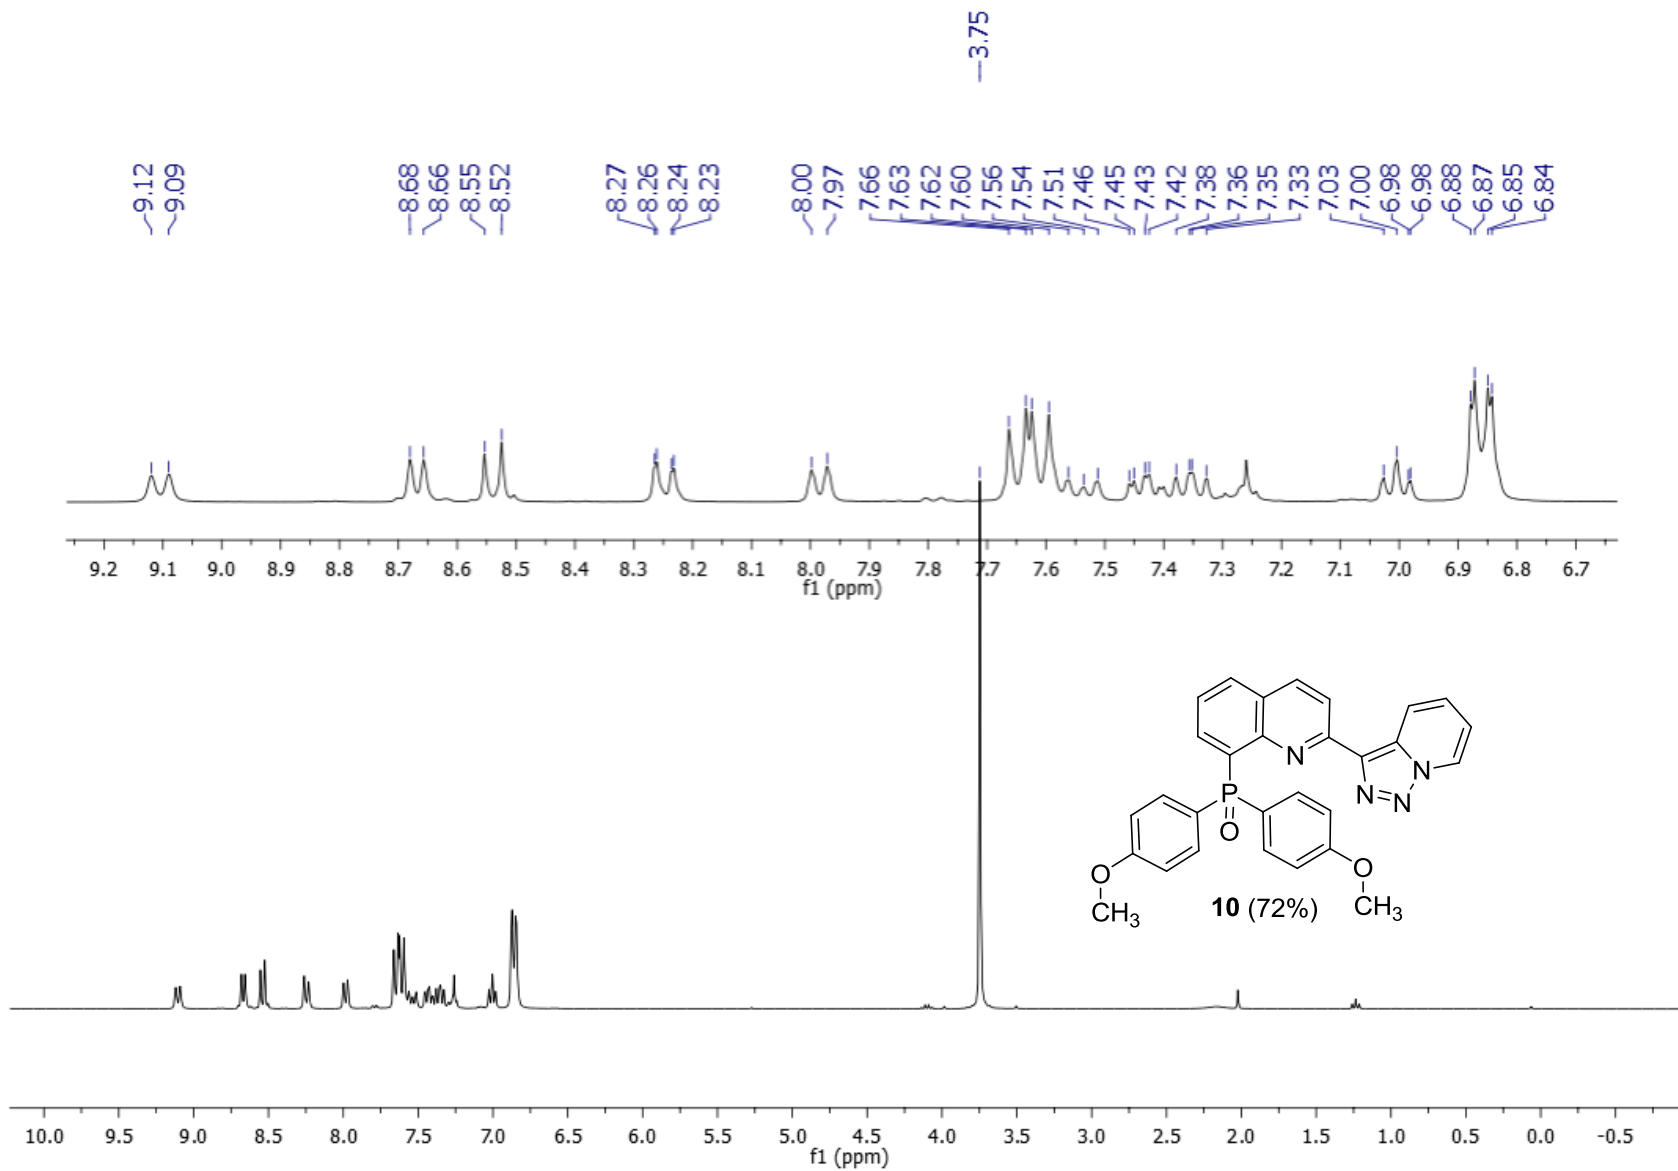

**Figure S8:**  $^1\text{H}$  NMR (300 MHz,  $\text{CDCl}_3$ ) of **10**:

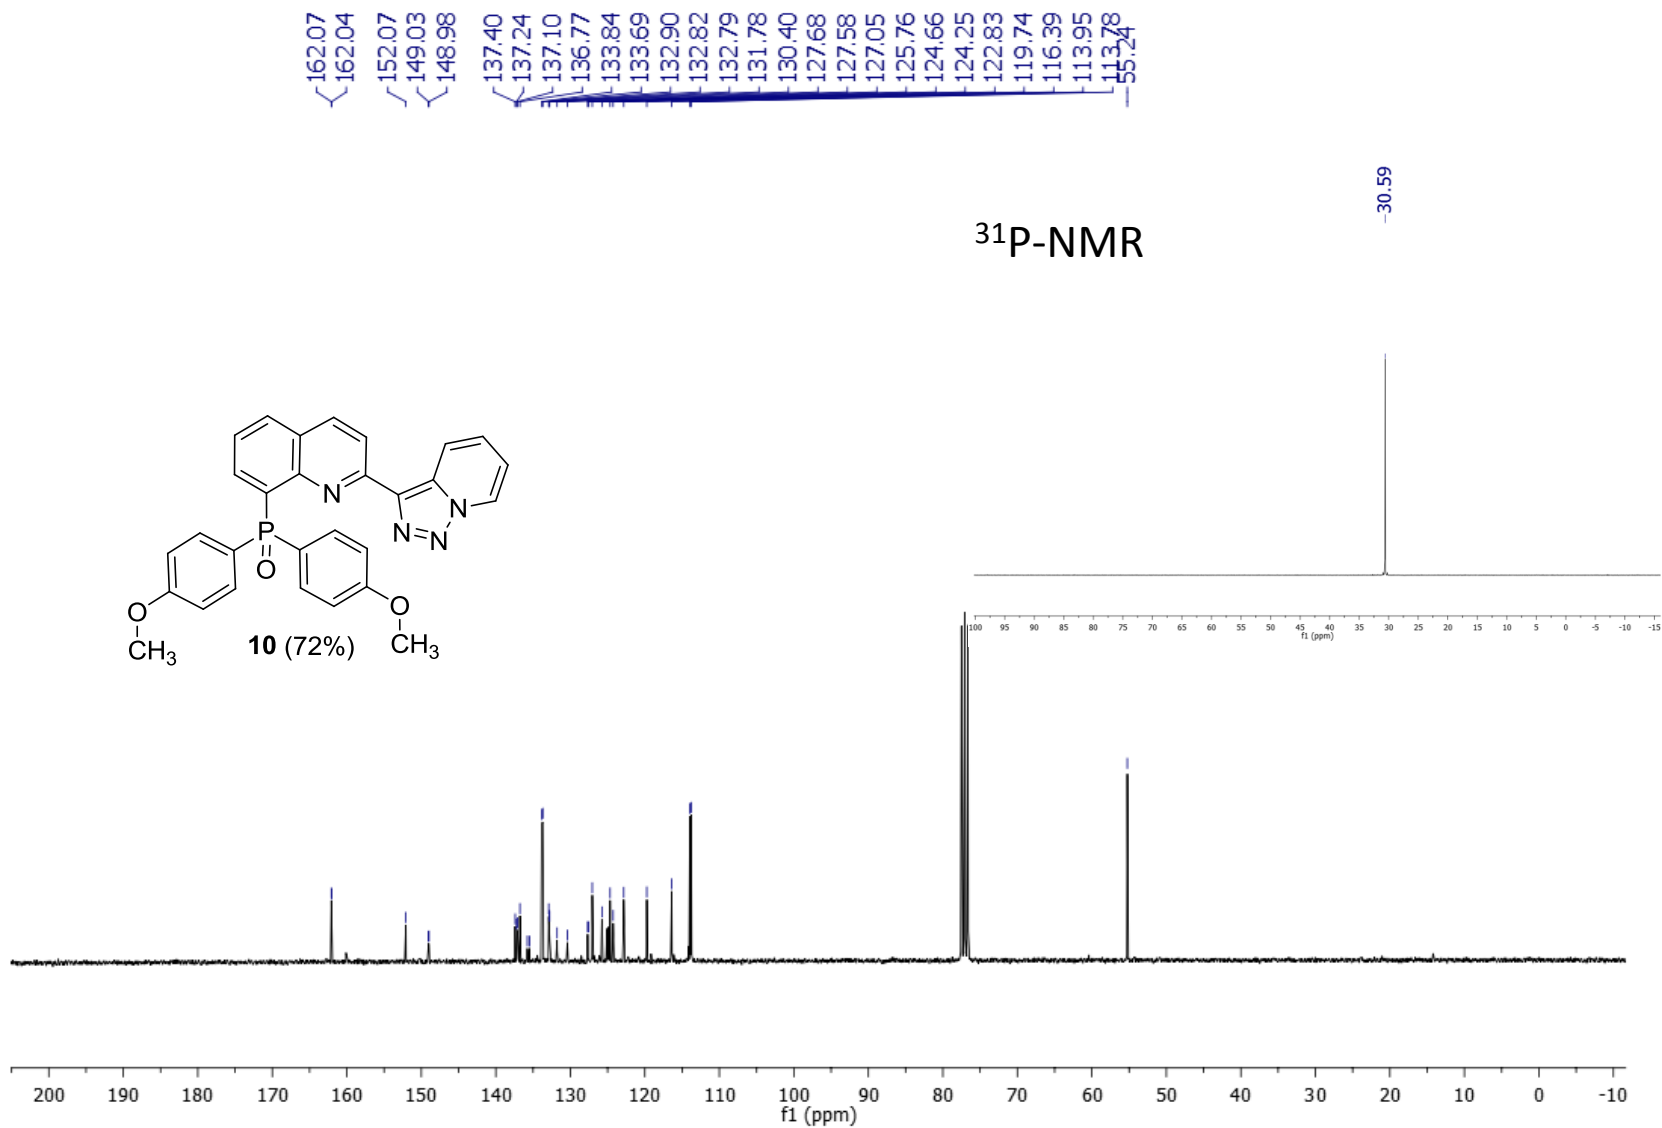

**Figure S9:** <sup>13</sup>C NMR (75.5 MHz, CDCl<sub>3</sub>) and <sup>31</sup>P NMR (161 MHz, CDCl<sub>3</sub>) of **10**:

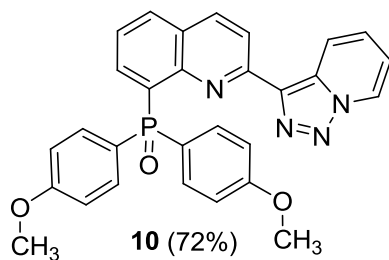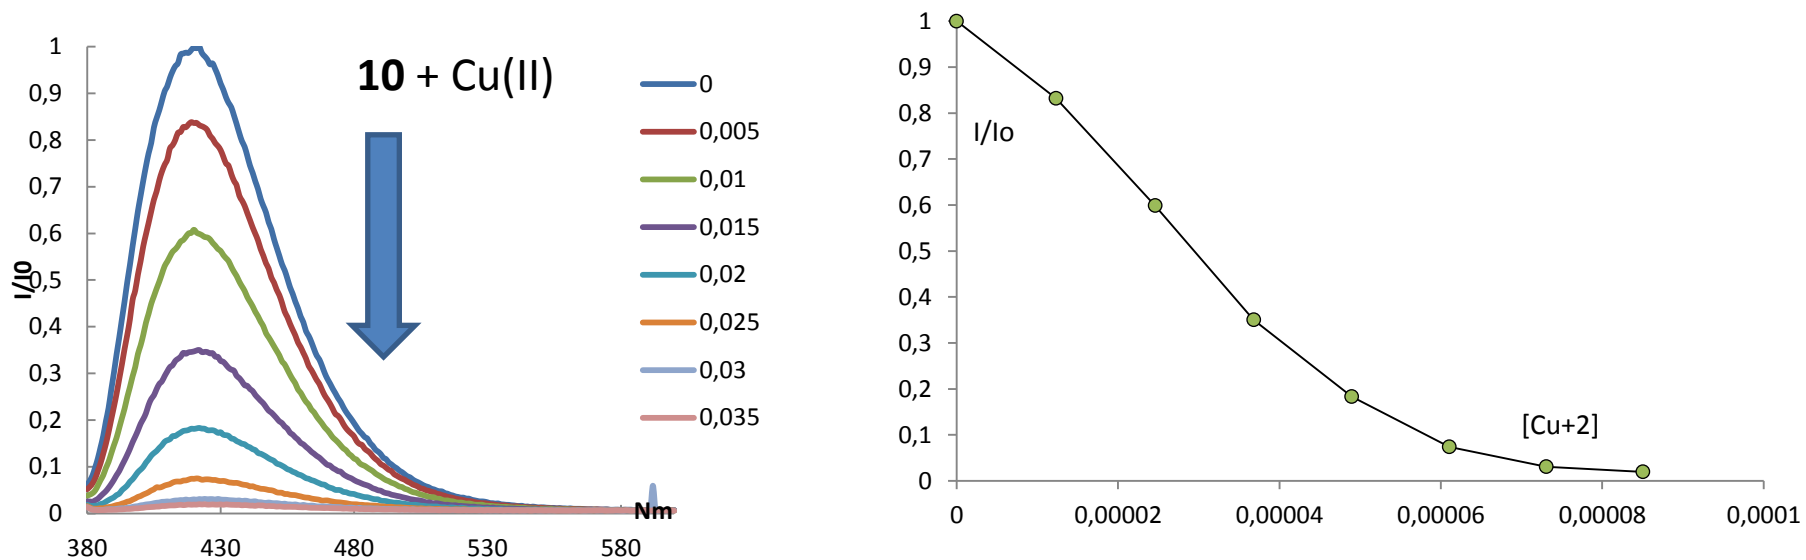

**Figure S10:** Fluorescence Quenching of **10** upon the addition of copper perchlorate salt



**2-([1,2,3]triazolo[1,5-*a*]pyridin-3-yl)-8-(dicyclohexylphosphoryl) quinoline (11):**

Pale yellow needles (0.3 g, 59%). mp 235 °C decomp. <sup>1</sup>H NMR (300 MHz, CDCl<sub>3</sub>): δ = 8.88 (app d, *J* = 7.2 Hz, 2H), 8.68 (d, *J* = 8.5 Hz, 1H), 8.46 (dd, *J* = 11.8, 6.8 Hz, 1H), 8.32 (d, *J* = 8.6 Hz, 1H), 7.99 (d, *J* = 7.9 Hz, 1H), 7.65 (t, *J* = 7.4, 7.4 Hz, 1H), 7.51 (dd, *J* = 8.6, 7.0 Hz, 1H), 7.17 (t, *J* = 6.8, 6.8 Hz, 1H), 2.9-2.7 (m, 2H), 2.4-2.2 (m, 2H), 1.9-0.8 (m, 18H). <sup>13</sup>C NMR (75.5 MHz, CDCl<sub>3</sub>): δ = 151.7 (C), 147.6 (C), 137.9 (d, *J* = 5.6 Hz, CH), 137.7 (d, *J* = 2.2 Hz, CH), 137.6 (d, *J* = 20.1 Hz, C), 137.5 (C), 131.9 (d, *J* = 1.5 Hz, CH), 131.8 (C), 127.3 (d, *J* = 7.2 Hz, C), 126.8 (d, *J* = 0.8 Hz, CH), 125.9 (CH), 125.7 (d, *J* = 10.2 Hz, CH), 119.9 (CH), 119.9 (CH), 116.1 (CH), 38.2 (d, *J* = 67.1 Hz, 2×CH), 26.7 (d, *J* = 3.5 Hz, 2×CH<sub>2</sub>), 26.6 (2×CH<sub>2</sub>), 26.0 (d, *J* = 3.6 Hz, 2×CH<sub>2</sub>), 25.7 (4×CH<sub>2</sub>). <sup>31</sup>P NMR (161 MHz, CDCl<sub>3</sub>): δ = 48.1 (PO). MS (EI): *m/z*(%) = 458(39), 430(47), 376(31), 348(30), 347(30), 301(22), 267(100), 266(30), 265(45), 219(36), 218(29). HRMS ESI-[TOF] for C<sub>29</sub>H<sub>31</sub>N<sub>4</sub>OP: calcd. 458.2235; found 458.2229.

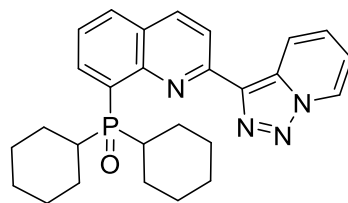

**11 (59%)**

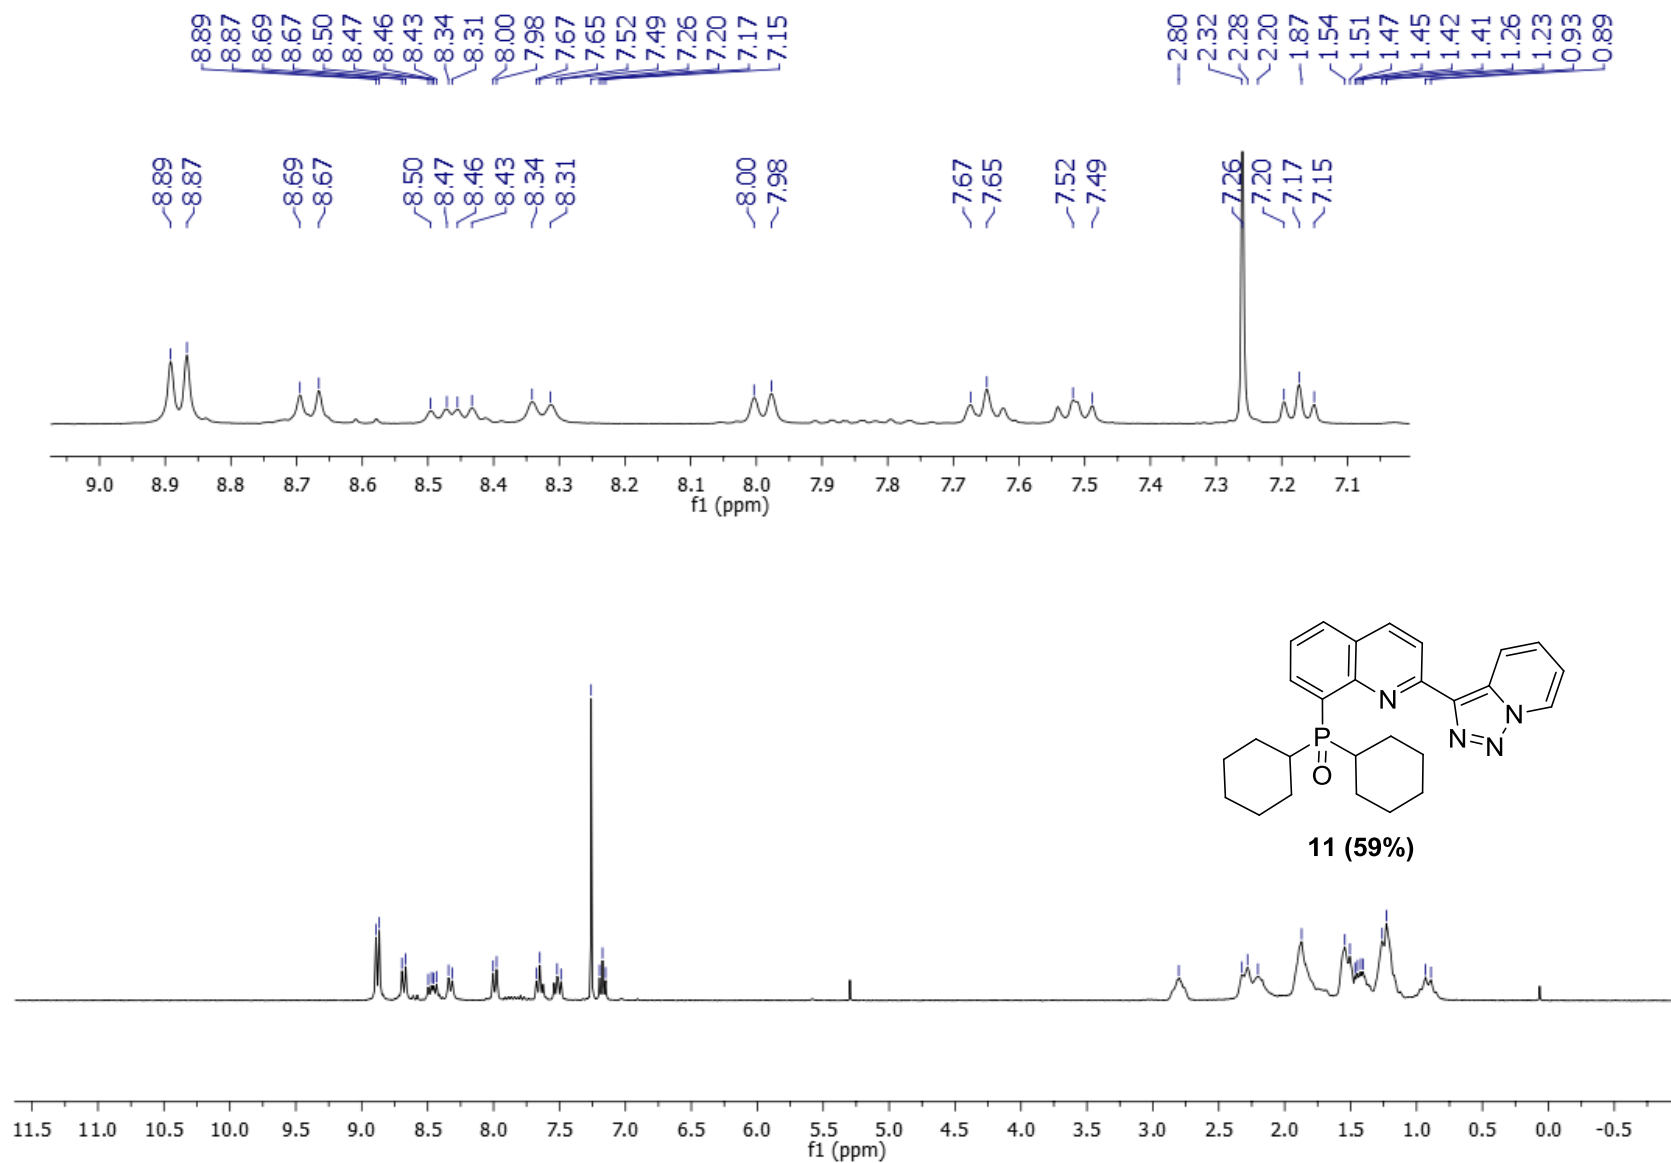

**Figure S11:**  $^1\text{H}$  NMR (300 MHz,  $\text{CDCl}_3$ ) of **11**:

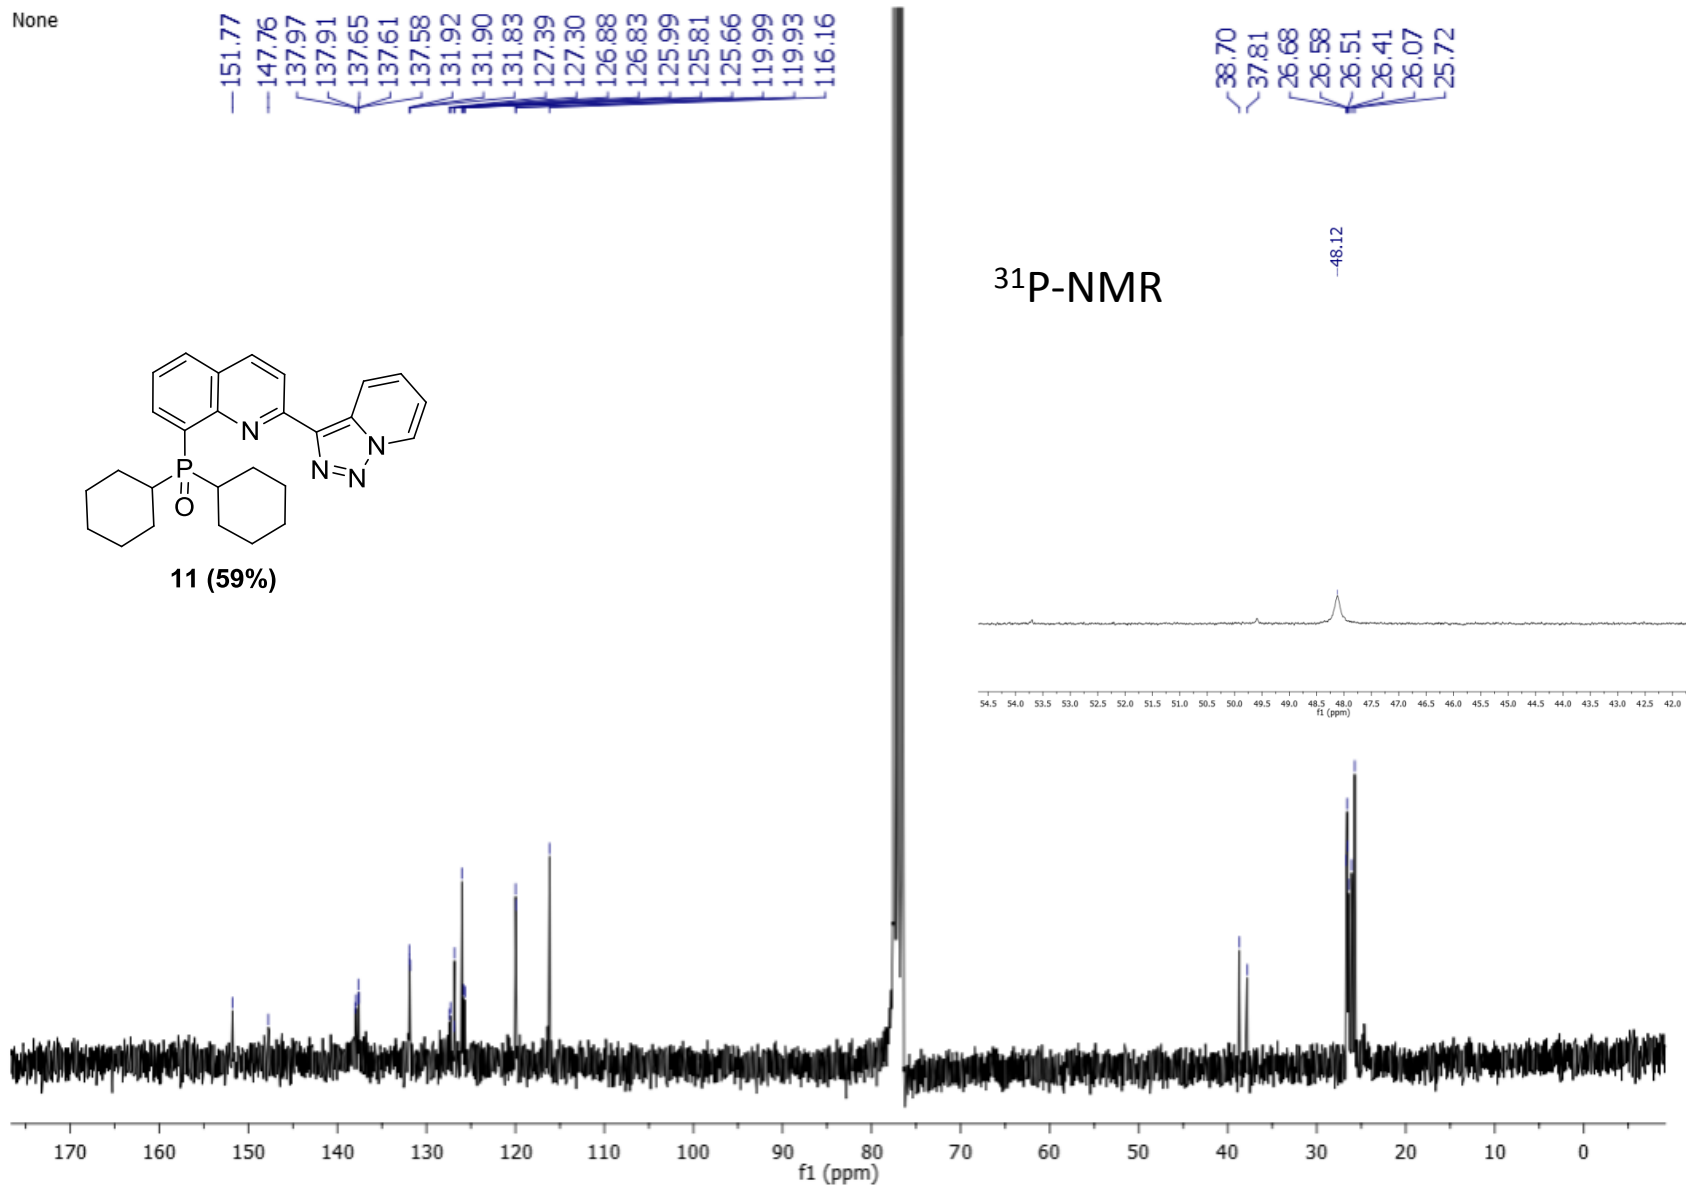

**Figure S12:**  $^{13}\text{C}$  NMR (75.5 MHz,  $\text{CDCl}_3$ ) and  $^{31}\text{P}$  NMR (161 MHz,  $\text{CDCl}_3$ ) of **11**:

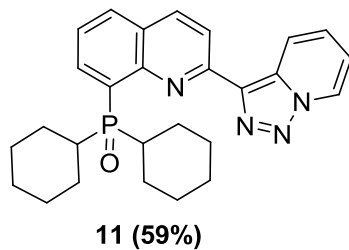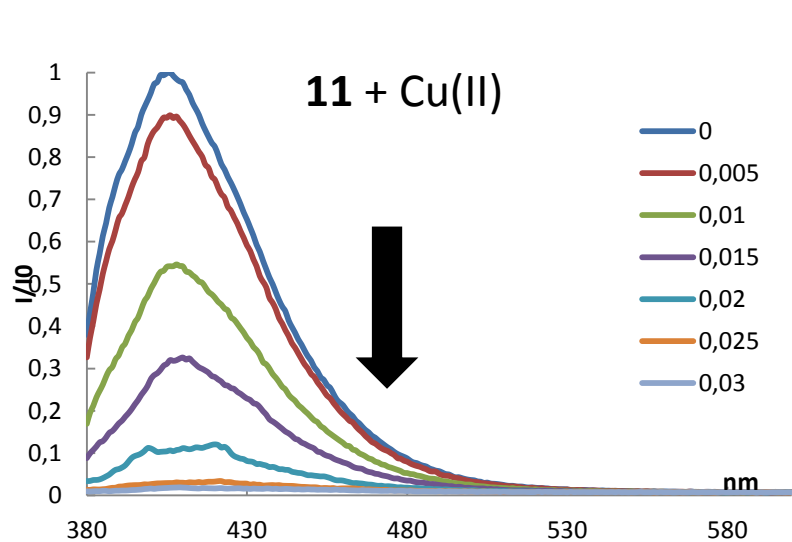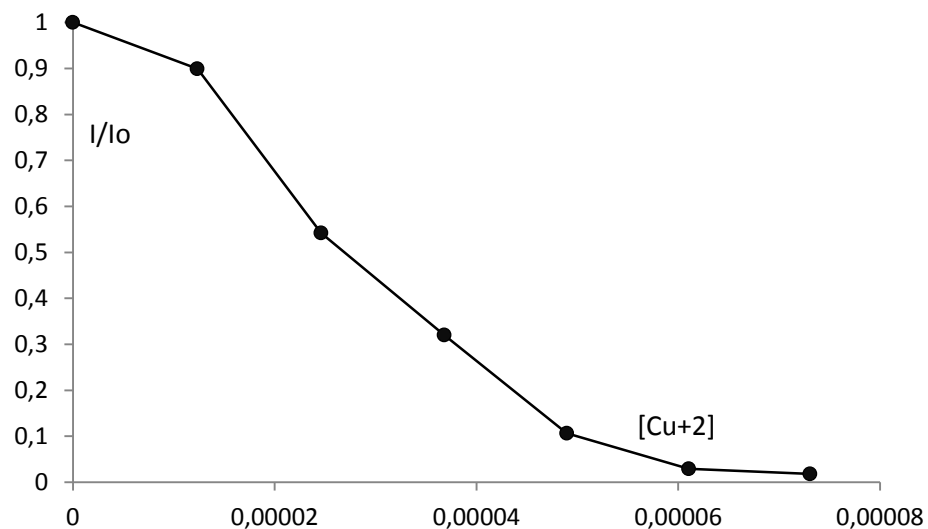

**Figure S13:** Fluorescence Quenching of **11** upon the addition of copper perchlorate salt

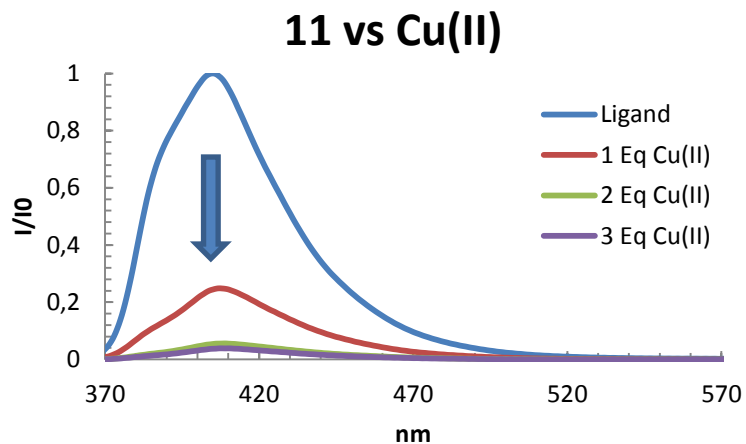

$[\mathbf{11}] = 0,0000298 \text{ M}$   
 $V_{\mathbf{11}}: 3 \text{ mL}$   
 $[\text{Cu(II)}] = 0,005 \text{ M}$   
 $\text{NH}_3 \text{ aq } 30\%$

**Figure S14:** Copper test

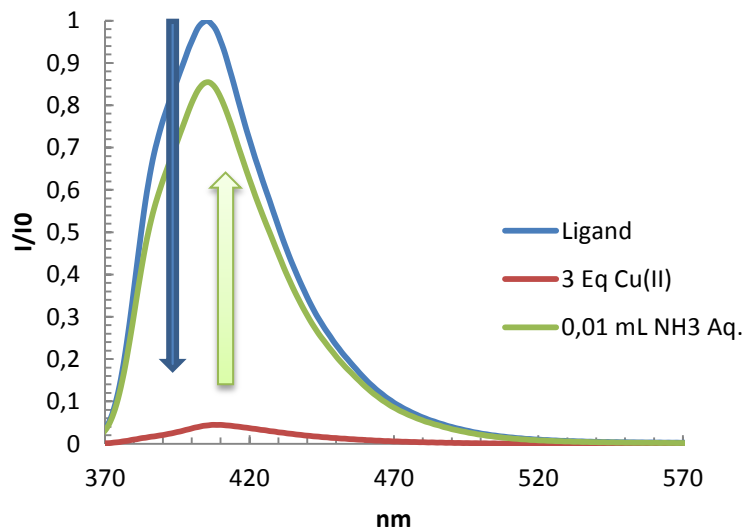

**Figure S15:** Copper test ammonia displacement.

## Zn(II)

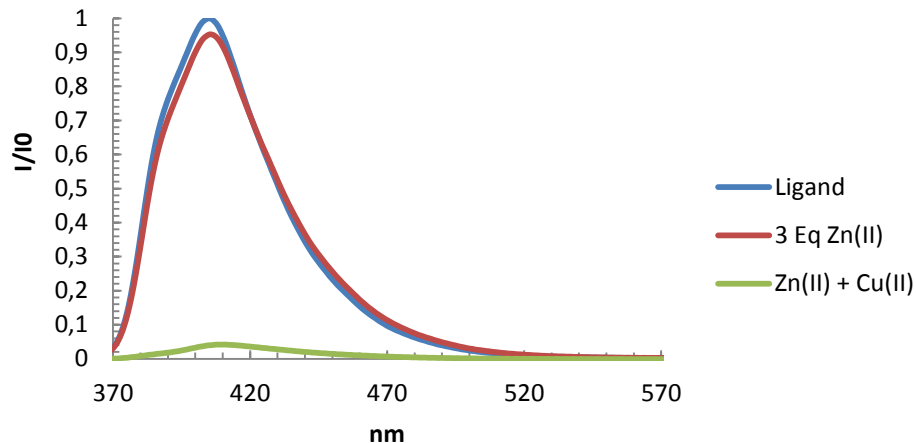

Figure S16: Zn(II) test

## Ni(II)

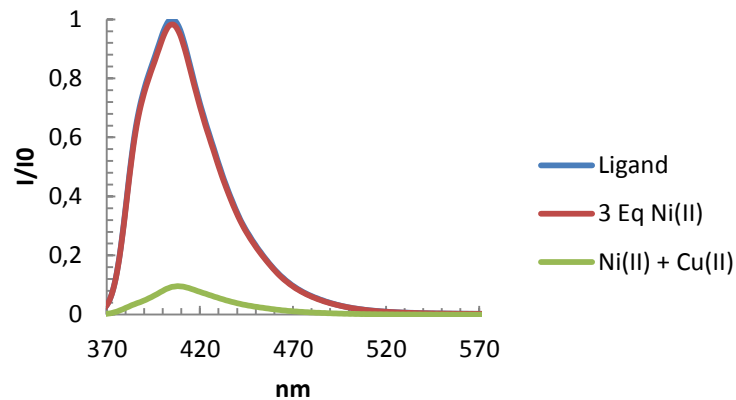

Figure S17: Ni(II) test

## Co(II)

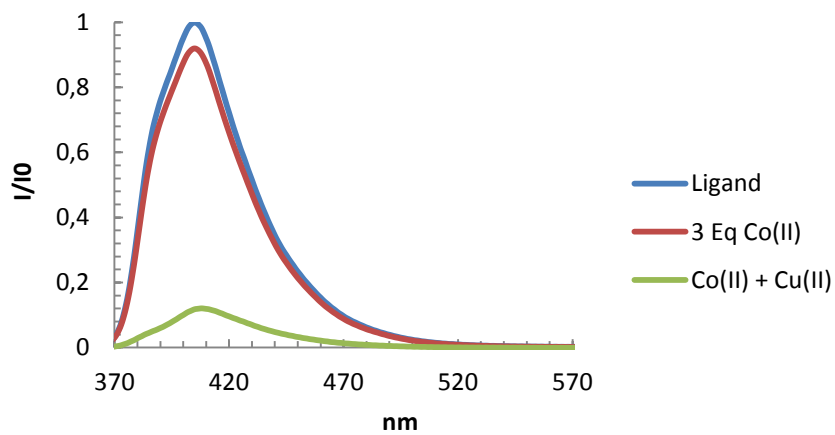

Figure S18: Co(II) test

## Cd(II)

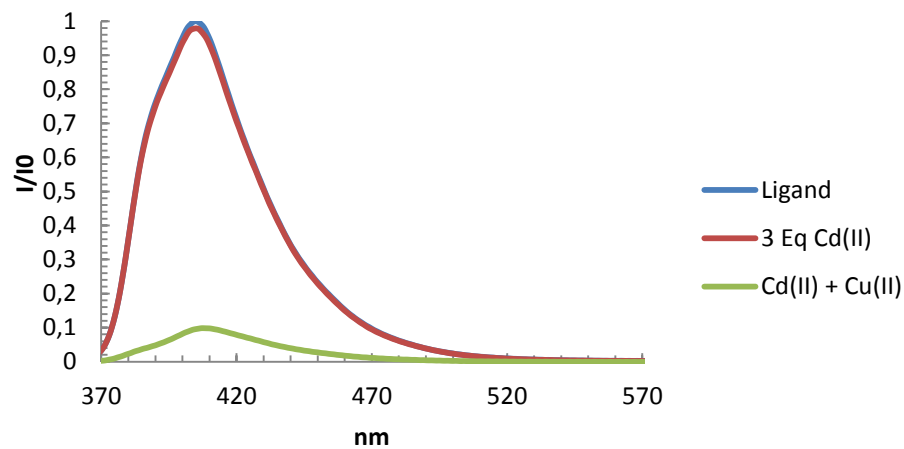

Figure S19: Cd(II) test

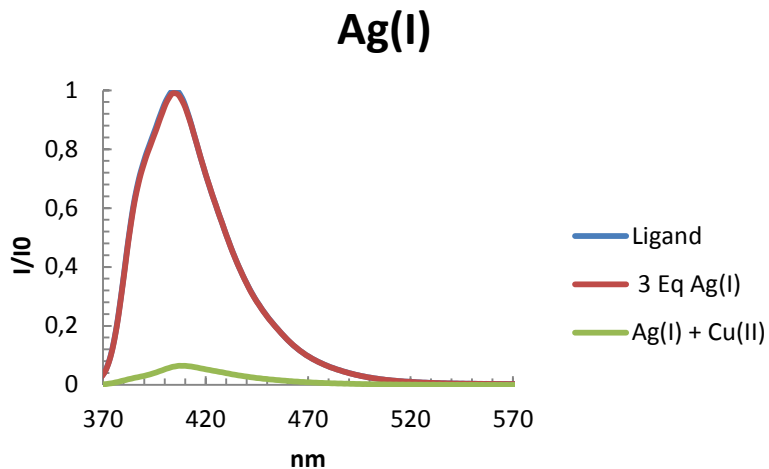

Figure S20: Ag(I) test

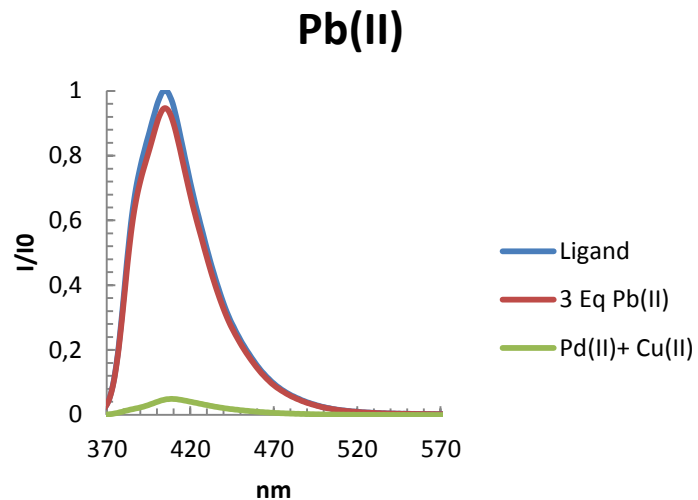

Figure S21: Pb(II) test

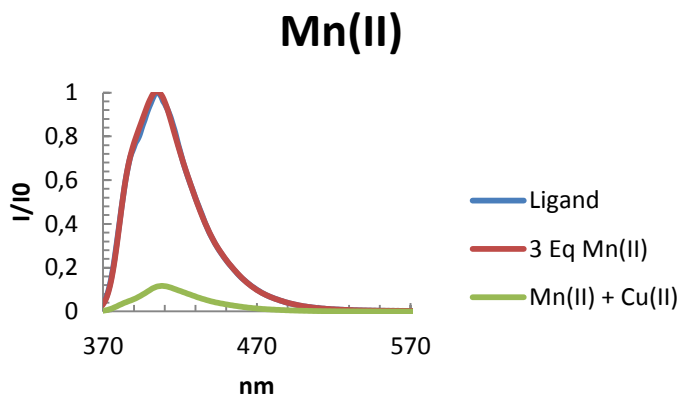

Figure S22: Mn(II) test

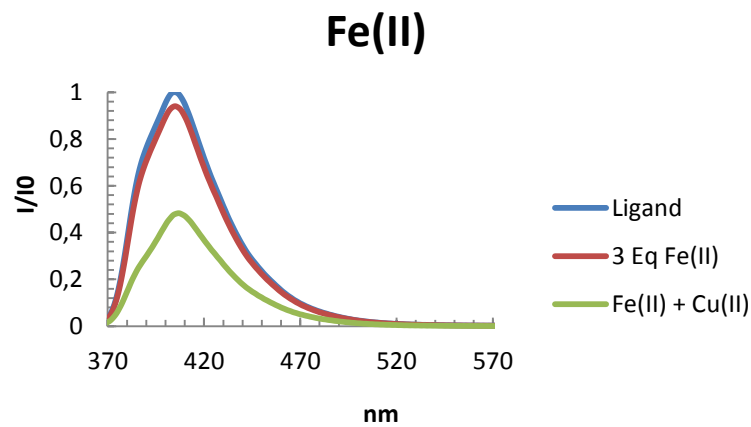

Figure S23: Fe(II) test

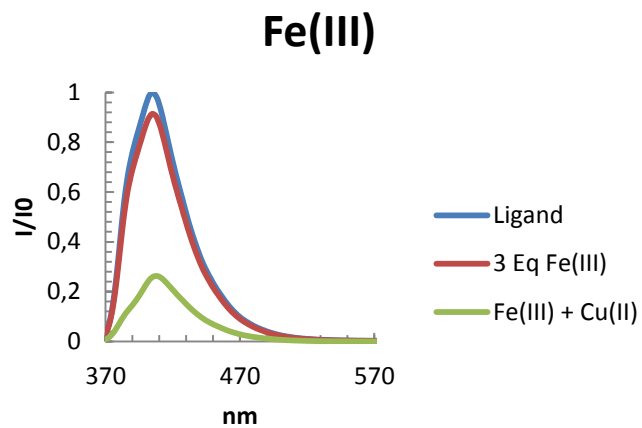

|           |        |   | V for 3 Eq |    |
|-----------|--------|---|------------|----|
| [Fe(III)] | 0,020  | M | 0,013      | mL |
| [Fe(II)]  | 0,101  | M | 0,003      | mL |
| [Co(II)]  | 0,1118 | M | 0,002      | mL |
| [Ni(II)]  | 0,1053 | M | 0,003      | mL |
| [Mn(II)]  | 0,099  | M | 0,003      | mL |
| [Pb(II)]  | 0,1049 | M | 0,003      | mL |
| [Cd(II)]  | 0,0995 | M | 0,003      | mL |
| [Ag(I)]   | 0,102  | M | 0,003      | mL |
| [Cu(II)]  | 0,005  | M | 0,054      | mL |
| [Zn(II)]  | 0,0966 | M | 0,003      | mL |

**Figure S24: Fe(III) test**
